# Supplementary material for: Endoglin regulates PI3-kinase/Akt trafficking and signaling to alter endothelial capillary stability during angiogenesis
Source: PubMed Central journal article supplement — Mol Biol Cell. 2012 Jul 1;23(13):2412–23. doi: 10.1091/mbc.E11-12-0993 (PMC3386206; doi:10.1091/mbc.e11-12-0993), 2012-07-01
Supplement: supp_E11-12-0993_CombinedSupMats.pdf [file supp_E11-12-0993_CombinedSupMats.pdf]

## Supplemental Figures

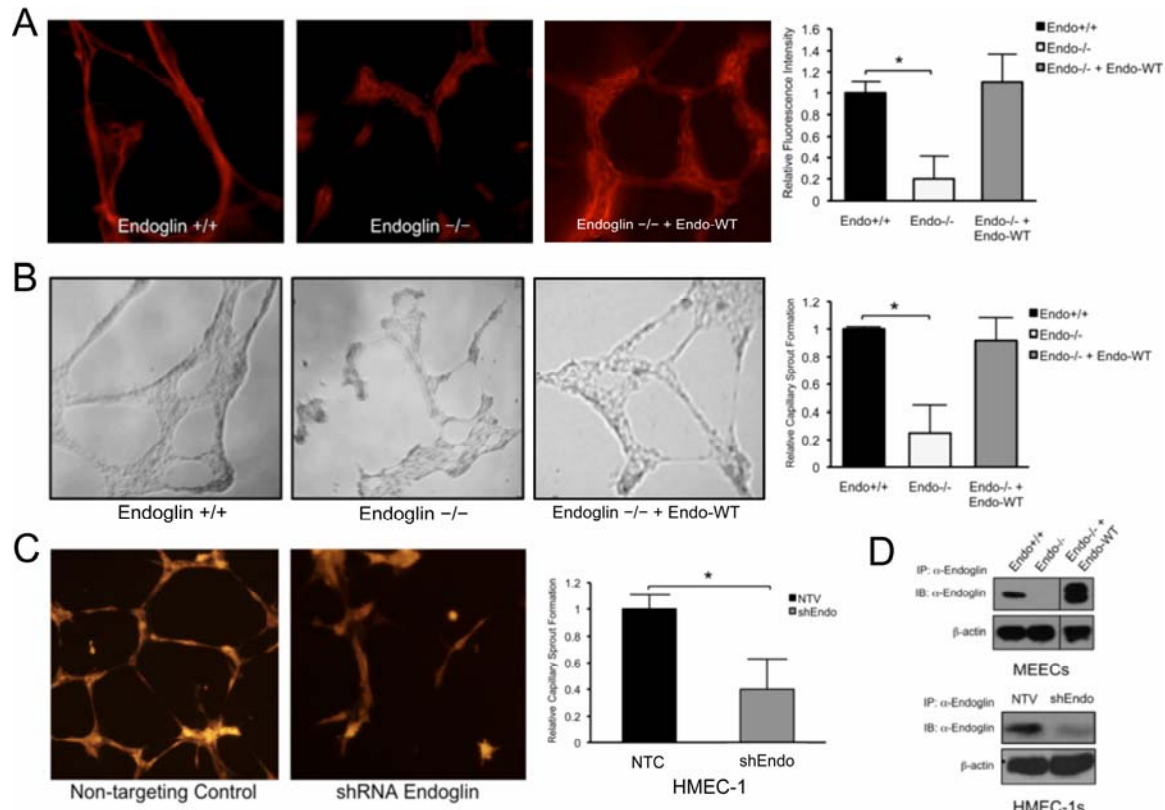

**Fig. S1**

(A) Immunofluorescence staining of VE-cadherin levels in Endo<sup>+/+</sup>, Endo<sup>-/-</sup> MEECs and Endo<sup>-/-</sup> + Endo-WT.

(B) 3-D collagen matrix assay assessing the effects of endoglin expression on tube formation (Endo<sup>+/+</sup>, Endo<sup>-/-</sup> MEECs and Endo<sup>-/-</sup> + Endo-WT MEECs).

(C) Fluorescence (red) of RFP-expressing HMEC-1s indicates capillary sprouting levels when HMEC-1s are infected with either non-targeting vector (NTC) or shRNA to endoglin.

(D) Biochemical analyses of endoglin expression in MEECs (upper panels) and HMEC-1s upon shRNA-mediated knockdown of endogenous endoglin (lower panels).

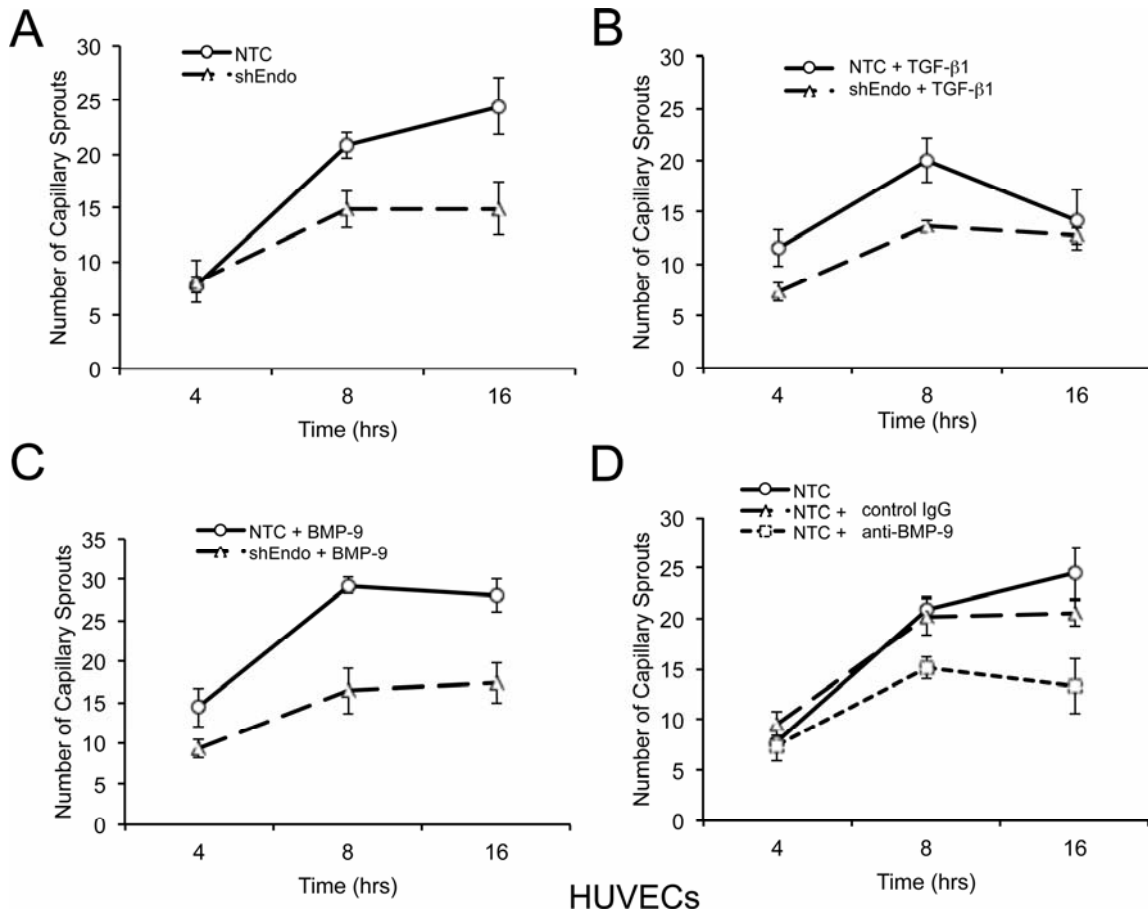

**Fig. S2**

(A) Primary HUVECs infected with adenovirus for non-targeting control (NTC) or shRNA to endoglin are plated for Matrigel-induced endothelial capillary sprouting assay.

(B-C) Primary HUVECs infected with adenovirus for NTC or shRNA to endoglin are plated for Matrigel-induced endothelial capillary sprouting treated with TGF-β1 (50 pM) or BMP-9 (16.5 nM) for 16 h.

(D) Primary HUVECs infected with adenovirus for NTC or shRNA to endoglin are plated for Matrigel-induced endothelial capillary sprouting no treatment, IgG control, or BMP-9 antibody (1 μg/mL).

Quantification of capillary sprouting for HUVECs represented in each graph is derived from at least 3 independent experiments. Each time point is statistically significant with  $p < 0.05$ .

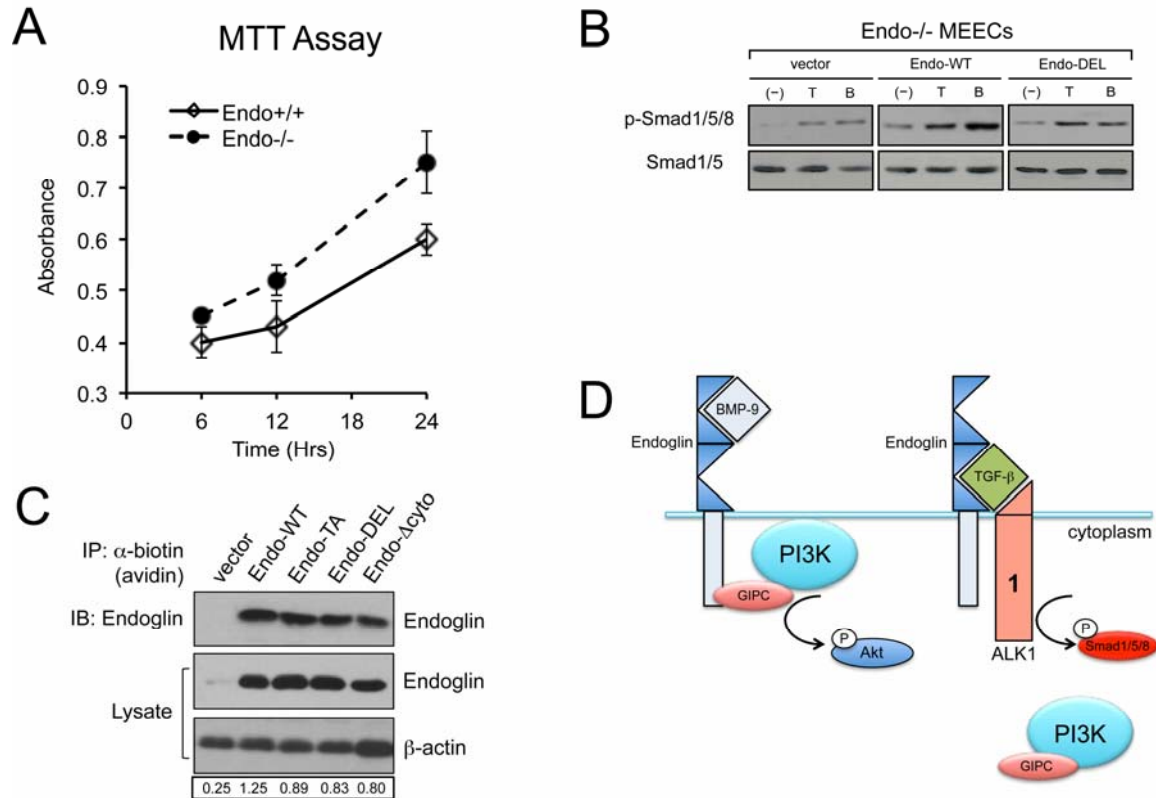

**Fig. S3**

(A) Endo<sup>+/+</sup> and Endo<sup>-/-</sup> MEEC cell proliferation determined by MTT assay. Data reflects three independent experiments done in triplicates.

(B) Comparison of Smad1/5/8 activation in Endo-WT versus Endo-DEL expressing Endo<sup>-/-</sup> MEECs. Cells were treated with TGF-β1 (50 pM) or BMP-9 (16.5 nM) for 30 min.

(C) Comparison of cell surface endoglin expression by cell surface biotinylation. Cell surface expression of Endo-WT, Endo-TA, Endo-DEL, and Endo-Δcyto in Endo<sup>-/-</sup> MEECs were quantified via densitometric analysis based on band intensities of biotinylated endoglin (top panel) relative to endoglin expression in lysate (middle panel). β-actin was used as loading control (lower panel).

(D) Schematic model of endoglin regulation of PI3K/Akt signalling.
